Title : ANESTHESIA PRODUCES SHUNT AND LOW  $\dot{V}_A/\dot{Q}$  AREAS BY REDUCING FRC

Authors : R. Dueck, M.D., M. L. Rathbun and E. McTigue

Affiliation: Department of Anesthesiology, University of California, San Diego and Veterans Administration Medical Center, San Diego, California 92161.

**Introduction.** Reduction in lung volume, increased intrapulmonary shunt, and development of low  $\dot{V}_A/\dot{Q}$  regions have all been demonstrated as a consequence of anesthesia. Studies in the sheep have suggested minimal increases in shunt and low  $\dot{V}_A/\dot{Q}$  areas with I.V. pentobarbital in comparison to  $N_2O$  and halothane inhalation anesthesia (1).<sup>2</sup> We therefore tested the hypothesis that this difference was due to differences in lung volume (functional residual capacity, FRC).

**Methods.** Four healthy adult sheep (40-60 kg), surgically prepared with a chronic tracheostomy and carotid artery subcutaneous tunnel, were studied during steady state awake control and anesthesia conditions, during either (i) pentobarbital 10 mg/kg + 50 mg increments I.V. on day one, and (ii) 68%  $N_2O$  and 0.6-1.0% end-tidal halothane concentration on day two, or the alternate sequence a minimum of 6 days later.

All studies were performed at  $F_{IO_2} = 0.3$ . Anesthesia studies were performed first during spontaneous ventilation, followed by mechanical ventilation with tidal volumes of 10 ml/kg and frequency adjusted to produce minute ventilation equal to awake, using pancuronium 0.1 mg/kg I.V. to prevent spontaneous respiratory efforts. Distributions of  $\dot{V}_A/\dot{Q}$  ratios were assessed with multiple tracer inert gas elimination using Ridge regression analysis (2). Closed circuit helium dilution was used to measure FRC following each  $\dot{V}_A/\dot{Q}$  determination with a Quintron model H-3 thermal conductivity detector gas chromatograph.

**Results.** Awake studies showed low levels of retention of the least soluble tracer gases, indicating a mean shunt of  $1.3 \pm 0.4\%$  (S.E.M.) and  $1.6 \pm 0.7\%$  of pulmonary blood flow to low  $\dot{V}_A/\dot{Q}$  ( $0.005 > \dot{V}_A/\dot{Q} < 0.1$ ) regions. FRC was  $1797 \pm 327$  ml (BTPS) during awake studies, with an average  $5.9 \pm 2.5$  (S.E.M.) % reduction during pentobarbital and  $29.9 \pm 6.9$  % reduction during  $N_2O$  and halothane anesthesia (both significant at  $p < 0.01$ , paired-t analysis). No significant increases in either shunt or low  $\dot{V}_A/\dot{Q}$  regions were seen during pentobarbital anesthesia, whereas all 4 sheep demonstrated increases in shunt and 3 had increased low  $\dot{V}_A/\dot{Q}$  regions (see below for mean  $\pm$  S.E.M.) during  $N_2O$  and halothane anesthesia. No consistent differences were noted in FRC, shunt and low  $\dot{V}_A/\dot{Q}$  regions for spontaneous versus mechanical ventilation.

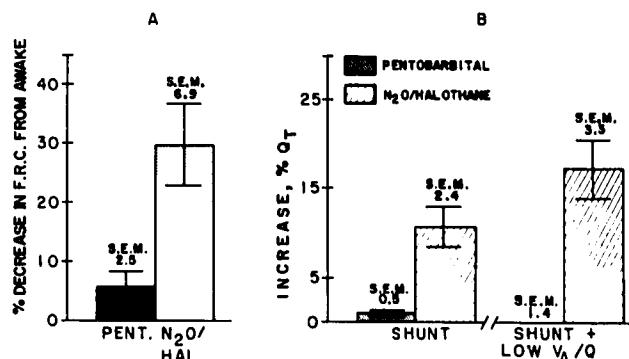

\* $p < 0.01$ , pentobarbital vs.  $N_2O$  and halothane anesthesia, paired-t analysis.

**Discussion.** An average 5-fold greater reduction in FRC during  $N_2O$  and halothane in comparison to pentobarbital anesthesia, with increases in shunt and low  $\dot{V}_A/\dot{Q}$  regions seen only during inhalation anesthesia, suggests that FRC reduction is the primary mechanism responsible for gas exchange impairment during anesthesia.

#### References.

1. Dueck R, Austin B, Rathbun M: The sheep as a model of impaired pulmonary gas exchange due to anesthesia. Abstracts of Scientific Papers, American Society of Anesthesiologists Annual Meeting, pp 461-462, 1978.
2. Evans JW, Wagner PD: Limits on  $\dot{V}_A/\dot{Q}$  distributions from analysis of experimental inert gas elimination. J Appl Physiol 42: 889-898, 1977.
